# Supplementary material for: Risk Factors of Decisional Conflict in People Living with Chronic Pain: a pan-Canadian survey.
Source: Research Square preprint supplement (doi:10.21203/rs.3.rs-5417847/v1), 2024-12-18
Supplement: Supplementary file 1 [file 4388471b3c50689a28bb1c8c.pdf]

**Supplementary Table S1:** Respondents' characteristics

| Characteristics                          | Descriptive analyses     | Complete sample<br>(n=1,373) | PwCP with DCS<br>score $\geq$ 37.5 (n=462) | PwCP with DCS<br>score<37.5 (n=911) |
|------------------------------------------|--------------------------|------------------------------|--------------------------------------------|-------------------------------------|
| <b>Socio-demographic characteristics</b> |                          |                              |                                            |                                     |
| Age (years)                              | Mean                     | 52.00                        | 48.24                                      | 52.91                               |
|                                          | SD                       | 16.36                        | 15.92                                      | 16.36                               |
|                                          | Min                      | 18.00                        | 18.00                                      | 18.00                               |
|                                          | Max                      | 90.00                        | 90.00                                      | 87.00                               |
| Sex                                      | Male: n (%)              | 686 (49.97%)                 | 218 (47.19%)                               | 468 (51.37%)                        |
|                                          | Female: n (%)            | 682 (49.67%)                 | 241 (52.16%)                               | 441 (48.41%)                        |
|                                          | Intersex: n (%)          | 4 (0.29%)                    | 2 (0.43%)                                  | 2 (0.22%)                           |
|                                          | Prefer not to say: n (%) | 1 (0.07%)                    | 1 (0.22%)                                  | 0 (0.00%)                           |
| Gender                                   | Man: n (%)               | 680 (49.53%)                 | 218 (47.18%)                               | 462 (50.71%)                        |
|                                          | Woman: n (%)             | 671 (48.87%)                 | 234 (50.65%)                               | 437 (47.97%)                        |
|                                          | Non-binary: n (%)        | 8 (0.58%)                    | 3 (0.65%)                                  | 5 (0.55%)                           |
|                                          | Transgender woman: n (%) | 1 (0.07%)                    | 1 (0.22%)                                  | 0 (0.00%)                           |
|                                          | Transgender man: n (%)   | 2 (0.15%)                    | 1 (0.22%)                                  | 1 (0.11%)                           |
|                                          | Two-spirit: n (%)        | 3 (0.22%)                    | 2 (0.43%)                                  | 1 (0.11%)                           |
|                                          | Gender fluid: n (%)      | 3 (0.22%)                    | 2 (0.43%)                                  | 1 (0.11%)                           |
|                                          | Other: n (%)             | 0 (0.00%)                    | 0 (0.00%)                                  | 0 (0.00%)                           |

|                        |                                        |               |              |              |
|------------------------|----------------------------------------|---------------|--------------|--------------|
|                        | Prefer not to say: n (%)               | 0 (0.00%)     | 0 (0.00%)    | 0 (0.00%)    |
|                        | Missing data: n (%)                    | 5 (0.36%)     | 1 (0.22%)    | 4 (0.44%)    |
| Provinces              | British Columbia: n (%)                | 220 (16.02%)  | 80 (17.32%)  | 140 (15.37%) |
|                        | Alberta: n (%)                         | 188 (13.69%)  | 53 (11.47%)  | 135 (14.82%) |
|                        | Prairies: n (%)                        | 103 (7.50%)   | 36 (7.79%)   | 67 (7.35%)   |
|                        | Ontario: n (%)                         | 487 (35.47%)  | 175 (37.88%) | 312 (34.25%) |
|                        | Quebec: n (%)                          | 273 (19.89%)  | 82 (17.75%)  | 191 (20.97%) |
|                        | Atlantic Canada: n (%)                 | 102 (7.43%)   | 36 (7.79%)   | 66 (7.24%)   |
| Geographical area      | Rural: n (%)                           | 162 (11.80%)  | 55 (11.90%)  | 107 (11.75%) |
|                        | Urban: n (%)                           | 1211 (88.20%) | 407 (88.10%) | 804 (88.25%) |
| First learned language | French: n (%)                          | 315 (22.94%)  | 98 (21.21%)  | 217 (23.82%) |
|                        | English: n (%)                         | 931 (67.80%)  | 318 (68.83%) | 613 (67.29%) |
|                        | An aboriginal language: n (%)          | 2 (0.15%)     | 2 (0.43%)    | 0 (0.00%)    |
|                        | Spanish: n (%)                         | 9 (0.66%)     | 5 (1.08%)    | 4 (0.44%)    |
|                        | Mandarin: n (%)                        | 15 (1.09%)    | 4 (0.87%)    | 11 (1.21%)   |
|                        | Arabic: n (%)                          | 9 (0.66%)     | 2 (0.43%)    | 7 (0.77%)    |
|                        | Other: n (%)                           | 92 (6.70%)    | 33 (7.14%)   | 59 (6.47%)   |
| Education level        | Less than a high school diploma: n (%) | 30 (2.19%)    | 10 (2.16%)   | 20 (2.20%)   |
|                        | High School diploma: n (%)             | 264 (19.23%)  | 89 (19.26%)  | 175 (19.21%) |

|                                   |                                                                      |              |              |              |
|-----------------------------------|----------------------------------------------------------------------|--------------|--------------|--------------|
|                                   | College, CEGEP or other non-university certificate or diploma: n (%) | 405 (29.50%) | 141 (30.52%) | 264 (28.98%) |
|                                   | University certificate: n (%)                                        | 135 (9.83%)  | 47 (10.17%)  | 88 (9.66%)   |
|                                   | Bachelor's degree: n (%)                                             | 351 (25.56%) | 105 (22.73%) | 246 (27.00%) |
|                                   | Above the bachelor's level: n (%)                                    | 181 (13.18%) | 67 (14.50%)  | 114 (12.51%) |
|                                   | Prefer not to say: n (%)                                             | 7 (0.51%)    | 3 (0.65%)    | 4 (0.44%)    |
| Cultural and ethnical backgrounds | Aboriginal: n (%)                                                    | 74 (5.39%)   | 21 (4.55%)   | 53 (5.82%)   |
|                                   | North American: n (%)                                                | 626 (45.59%) | 217 (46.97%) | 409 (44.90%) |
|                                   | European: n (%)                                                      | 552 (40.20%) | 172 (37.23%) | 380 (41.71%) |
|                                   | Caribbean: n (%)                                                     | 20 (1.46%)   | 10 (2.16%)   | 10 (1.10%)   |
|                                   | Latin, south American: n (%)                                         | 15 (1.09%)   | 5 (1.08%)    | 10 (1.10%)   |
|                                   | African: n (%)                                                       | 20 (1.46%)   | 7 (1.52%)    | 13 (1.43%)   |
|                                   | Asian: n (%)                                                         | 144 (10.49%) | 55 (11.90%)  | 89 (9.77%)   |
|                                   | Oceanian: n (%)                                                      | 3 (0.22%)    | 0 (0.00%)    | 3 (0.33%)    |
|                                   | Other: n (%)                                                         | 4 (0.29%)    | 1 (0.22%)    | 3 (0.33%)    |
|                                   | Prefer not to say: n (%)                                             | 38 (2.77%)   | 16 (3.46%)   | 22 (2.41%)   |
| Spirituality                      | Buddhist: n (%)                                                      | 17 (1.25%)   | 6 (1.30%)    | 11 (1.21%)   |
|                                   | Christian: n (%)                                                     | 578 (42.09%) | 162 (35.06%) | 416 (45.65%) |
|                                   | Hindu: n (%)                                                         | 12 (0.87%)   | 8 (1.73%)    | 4 (0.44%)    |
|                                   | Jewish: n (%)                                                        | 19 (1.38%)   | 10 (2.16%)   | 9 (0.99%)    |

|                                   |                                                             |              |              |              |
|-----------------------------------|-------------------------------------------------------------|--------------|--------------|--------------|
|                                   | Muslim: n (%)                                               | 31 (2.26%)   | 10 (2.16%)   | 21 (2.31%)   |
|                                   | Sikh: n (%)                                                 | 13 (0.95%)   | 6 (1.30%)    | 7 (0.77%)    |
|                                   | Traditional (North American Indigenous) spirituality: n (%) | 21 (1.53%)   | 8 (1.73%)    | 13 (1.43%)   |
|                                   | Other: n (%)                                                | 26 (1.89%)   | 10 (2.16%)   | 16 (1.76%)   |
|                                   | No religious or spiritual affiliations: n (%)               | 601 (43.77%) | 218 (47.19%) | 383 (42.04%) |
|                                   | Prefer not to say: n (%)                                    | 55 (4.01%)   | 24 (5.19%)   | 31 (3.40%)   |
| Marital status                    | Never legally married: n (%)                                | 329 (23.96%) | 133 (28.79%) | 196 (21.52%) |
|                                   | Legally married: n (%)                                      | 647 (47.12%) | 185 (40.04%) | 462 (50.71%) |
|                                   | Separated, but still legally married: n (%)                 | 40 (2.92%)   | 20 (4.33%)   | 20 (2.20%)   |
|                                   | Divorced: n (%)                                             | 116 (8.45%)  | 42 (9.09%)   | 74 (8.12%)   |
|                                   | Widowed: n (%)                                              | 50 (3.64%)   | 15 (3.25%)   | 35 (3.84%)   |
|                                   | Living common law: n (%)                                    | 170 (12.38%) | 57 (12.34%)  | 113 (12.40%) |
|                                   | Prefer not to say: n (%)                                    | 21 (1.53%)   | 10 (2.16%)   | 11 (1.21%)   |
| Number of people in the household | Mean                                                        | 2.50         | 2.53         | 2.48         |
|                                   | SD                                                          | 1.28         | 1.34         | 1.25         |
|                                   | Min                                                         | 1.00         | 1.00         | 1.00         |
|                                   | Max                                                         | 10.00        | 10.00        | 9.00         |
|                                   | Less than \$50,000: n (%)                                   | 388 (28.26%) | 139 (30.09%) | 249 (27.33%) |

|                        |                                                      |              |              |              |
|------------------------|------------------------------------------------------|--------------|--------------|--------------|
| Household income (CAD) | \$50,000 to less than \$60,000: n (%)                | 172 (12.54%) | 62 (13.42%)  | 110 (12.08%) |
|                        | \$60,000 to less than \$80,000: n (%)                | 185 (13.47%) | 58 (12.55%)  | 127 (13.94%) |
|                        | \$80,000 to less than \$100,000: n (%)               | 192 (13.98%) | 59 (12.77%)  | 133 (14.60%) |
|                        | \$100,000 or more: n (%)                             | 350 (25.49%) | 104 (22.51%) | 246 (27.00%) |
|                        | Prefer not to say: n (%)                             | 86 (6.26%)   | 40 (8.66%)   | 46 (5.05%)   |
| Work status            | Currently working full-time: n (%)                   | 551 (40.13%) | 188 (40.69%) | 363 (39.85%) |
|                        | Currently working part-time: n (%)                   | 123 (8.96%)  | 38 (8.23%)   | 85 (9.33%)   |
|                        | Homemaker, no outside employment: n (%)              | 54 (3.93%)   | 18 (3.90%)   | 36 (3.95%)   |
|                        | Student: n (%)                                       | 51 (3.71%)   | 19 (4.11%)   | 32 (3.51%)   |
|                        | Unemployed: n (%)                                    | 52 (3.79%)   | 25 (5.41%)   | 27 (2.96%)   |
|                        | Retired: n (%)                                       | 415 (30.23%) | 111 (24.03%) | 304 (33.37%) |
|                        | Long term or permanent disability: n (%)             | 85 (6.19%)   | 38 (8.23%)   | 47 (5.16%)   |
|                        | Total sick leave with financial assistance: n (%)    | 15 (1.09%)   | 9 (1.95%)    | 6 (0.66%)    |
|                        | Total sick leave with no financial assistance: n (%) | 11 (0.80%)   | 4 (0.87%)    | 7 (0.77%)    |
|                        | Partial sick leave: n (%)                            | 3 (0.22%)    | 3 (0.65%)    | 0 (0.00%)    |

|                             |                          |              |              |              |
|-----------------------------|--------------------------|--------------|--------------|--------------|
|                             | Prefer not to say: n (%) | 13 (0.95%)   | 9 (1.95%)    | 4 (0.44%)    |
| <b>Pain characteristics</b> |                          |              |              |              |
| Pain location               | Head: n (%)              | 213 (15.51%) | 94 (20.35%)  | 119 (13.06%) |
|                             | Face: n (%)              | 46 (3.35%)   | 25 (5.41%)   | 21 (2.31%)   |
|                             | Neck: n (%)              | 478 (34.81%) | 187 (40.48%) | 291 (31.94%) |
|                             | Middle back: n (%)       | 409 (29.79%) | 132 (28.57%) | 277 (30.41%) |
|                             | Low back: n (%)          | 794 (57.83%) | 284 (61.47%) | 510 (55.98%) |
|                             | Upper limb: n (%)        | 337 (24.54%) | 110 (23.81%) | 227 (24.92%) |
|                             | Lower limb: n (%)        | 544 (39.62%) | 188 (40.69%) | 356 (39.08%) |
|                             | Abdominal: n (%)         | 135 (9.83%)  | 58 (12.55%)  | 77 (8.45%)   |
|                             | Pelvic: n (%)            | 163 (11.87%) | 76 (16.45%)  | 87 (9.55%)   |
|                             | Chest: n (%)             | 73 (5.32%)   | 32 (6.93%)   | 41 (4.50%)   |
|                             | Other: n (%)             | 9 (0.66%)    | 3 (0.65%)    | 6 (0.66%)    |
|                             | Mean                     | 2.33         | 2.58         | 2.21         |
|                             | SD                       | 1.53         | 1.78         | 1.37         |
|                             | Min                      | 1.00         | 1.00         | 1.00         |
|                             | Max                      | 10.00        | 10.00        | 10.00        |
| Pain duration (months)      | Mean                     | 102.2        | 103.3        | 101.6        |
|                             | SD                       | 113.95       | 109.57       | 116.17       |
|                             | Min                      | 3.00         | 3.00         | 3.00         |

|                                                |                                    |              |              |              |
|------------------------------------------------|------------------------------------|--------------|--------------|--------------|
|                                                | Max                                | 708.00       | 600.00       | 708.00       |
|                                                | Don't remember precisely: n (%)    | 135, (9.83%) | 46, (9.96%)  | 89, (9.77%)  |
| Comorbidity                                    | Diabetes: n (%)                    | 204 (14.86%) | 63 (13.64%)  | 141 (15.48%) |
|                                                | Mental health disorders: n (%)     | 438 (31.90%) | 188 (40.69%) | 250 (27.44%) |
|                                                | Alcohol-related disorders: n (%)   | 49 (3.57%)   | 15 (3.25%)   | 34 (3.73%)   |
|                                                | Substance-related disorders: n (%) | 54 (3.93%)   | 22 (4.76%)   | 32 (3.51%)   |
|                                                | Sleep disorders: n (%)             | 417 (30.37%) | 147 (31.82%) | 270 (29.64%) |
|                                                | Hypertension: n (%)                | 373 (27.17%) | 104 (22.51%) | 269 (29.53%) |
|                                                | Respiratory disorders: n (%)       | 193 (14.06%) | 61 (13.20%)  | 133 (14.60%) |
|                                                | Other: n (%)                       | 178 (12.96%) | 62 (13.42%)  | 116 (12.73%) |
|                                                | No comorbidity: n (%)              | 360 (26.22%) | 105 (22.73%) | 255 (27.99%) |
|                                                | Mean                               | 1.39         | 1.42         | 1.37         |
|                                                | SD                                 | 1.20         | 1.15         | 1.23         |
|                                                | Min                                | 0.00         | 0.00         | 0.00         |
|                                                | Max                                | 6.00         | 5.00         | 6.00         |
| Perceived disability and/or emotional distress | Yes: n (%)                         | 689 (50.18%) | 252 (54.55%) | 437 (47.97%) |
|                                                | No: n (%)                          | 684 (49.82%) | 210 (45.45%) | 474 (52.03%) |
|                                                | Mean                               | 4.57         | 4.08         | 4.82         |

|                                                  |                                                                            |              |              |              |
|--------------------------------------------------|----------------------------------------------------------------------------|--------------|--------------|--------------|
| Quality of life<br>(seven-point Likert<br>scale) | SD                                                                         | 1.27         | 1.27         | 1.19         |
|                                                  | Min                                                                        | 1.00         | 1.00         | 1.00         |
|                                                  | Max                                                                        | 7.00         | 7.00         | 7.00         |
| Health state<br>satisfaction                     | Yes: n (%)                                                                 | 874 (63.66%) | 214 (46.32%) | 660 (72.45%) |
|                                                  | No: n (%)                                                                  | 499 (36.34%) | 248 (53.68%) | 251 (27.55%) |
| <b>Decision-making characteristics</b>           |                                                                            |              |              |              |
| Most difficult<br>decision                       | Take medication: n (%)                                                     | 278 (20.25%) | 87 (18.83%)  | 191 (20.96%) |
|                                                  | Get surgery: n (%)                                                         | 252 (18.35%) | 73 (15.80%)  | 179 (19.65%) |
|                                                  | Change my treatment: n (%)                                                 | 102 (7.44%)  | 40 (8.66%)   | 62 (6.81%)   |
|                                                  | Stop my treatment: n (%)                                                   | 60 (4.37%)   | 23 (4.98%)   | 37 (4.06%)   |
|                                                  | Change my lifestyle habits<br>and behaviours: n (%)                        | 191 (13.91%) | 52 (11.26%)  | 139 (15.26%) |
|                                                  | Consult a rehabilitation<br>professional: n (%)                            | 59 (4.30%)   | 27 (5.84%)   | 32 (3.51%)   |
|                                                  | Consult a complementary and<br>alternative medicine<br>professional: n (%) | 146 (10.63%) | 51 (11.04%)  | 95 (10.43%)  |
|                                                  | Consult a mental-health<br>professional: n (%)                             | 50 (3.64%)   | 15 (3.25%)   | 35 (3.84%)   |
|                                                  | Change the health care<br>provider to manage my<br>condition: n (%)        | 93 (6.77%)   | 42 (9.09%)   | 51 (5.60%)   |



|                                                                            |                                                                  |               |              |              |
|----------------------------------------------------------------------------|------------------------------------------------------------------|---------------|--------------|--------------|
|                                                                            | Undergo more diagnostic tests: n (%)                             | 139 (10.12%)  | 50 (10.82%)  | 89 (9.77%)   |
|                                                                            | Other: n (%)                                                     | 3 (0.22%)     | 2 (0.43%)    | 1 (0.11%)    |
| Prior knowledge on the available options                                   | Yes, for all the options: n (%)                                  | 337 (24.55%)  | 68 (14.72%)  | 269 (29.53%) |
|                                                                            | Yes, for certain options: n (%)                                  | 771 (56.15%)  | 259 (56.06%) | 512 (56.20%) |
|                                                                            | No: n (%)                                                        | 265 (19.30%)  | 135 (29.22%) | 130 (14.27%) |
| Decision self-efficacy (11-point Likert scale)                             | Mean                                                             | 6.42          | 4.95         | 7.16         |
|                                                                            | SD                                                               | 2.22          | 2.07         | 1.91         |
|                                                                            | Min                                                              | 0.00          | 0.00         | 0.00         |
|                                                                            | Max                                                              | 10.00         | 10.00        | 10.00        |
| Congruence between the chosen and preferred option                         | Yes: n (%)                                                       | 853 (62.13%)  | 184 (39.83%) | 669 (73.44%) |
|                                                                            | No: n (%)                                                        | 198 (14.42%)  | 115 (24.89%) | 83 (9.11%)   |
|                                                                            | I don't know, I let my health care provider decide for me: n (%) | 251 (18.28%)  | 122 (26.41%) | 129 (14.16%) |
|                                                                            | Missing data: n (%)                                              | 71 (5.17%)    | 41 (8.87%)   | 30 (3.29%)   |
| Health literacy (problem understanding what healthcare professionals said) | Always: n (%)                                                    | 29 (2.12%)    | 9 (1.95%)    | 20 (2.20%)   |
|                                                                            | Often: n (%)                                                     | 156 (11.36 %) | 73 (15.80%)  | 83 (9.11%)   |
|                                                                            | Sometimes: n (%)                                                 | 419 (30.52%)  | 200 (43.29%) | 219 (24.04%) |
|                                                                            | Occasionally: n (%)                                              | 372 (27.09%)  | 101 (21.86%) | 271 (29.75%) |

|                                                        |                                                                                         |              |              |              |
|--------------------------------------------------------|-----------------------------------------------------------------------------------------|--------------|--------------|--------------|
|                                                        | Never: n (%)                                                                            | 397 (28.91%) | 79 (17.10%)  | 318 (34.90%) |
| Perceived stress during the consultation               | Yes: n (%)                                                                              | 595 (43.34%) | 275 (59.52%) | 320 (35.13%) |
|                                                        | No: n (%)                                                                               | 685 (49.89%) | 130 (28.14%) | 555 (60.92%) |
|                                                        | I don't remember: n (%)                                                                 | 93 (6.77%)   | 57 (12.34%)  | 36 (3.95%)   |
| Involvement of important other(s)                      | Spouse: n (%)                                                                           | 530 (38.60%) | 156 (33.77%) | 374 (41.05%) |
|                                                        | Children: n (%)                                                                         | 112 (8.16%)  | 29 (6.28%)   | 83 (9.11%)   |
|                                                        | Friends: n (%)                                                                          | 169 (12.31%) | 52 (11.26%)  | 117 (12.84%) |
|                                                        | Professional occupation in religion: n (%)                                              | 45 (3.28%)   | 14 (3.03%)   | 31 (3.40%)   |
|                                                        | Other member of close family: n (%)                                                     | 192 (13.98%) | 69 (14.94%)  | 123 (13.50%) |
|                                                        | Other: n (%)                                                                            | 5 (0.36%)    | 1 (0.22%)    | 4 (0.44%)    |
|                                                        | Nobody: n (%)                                                                           | 595 (43.33%) | 212 (45.89%) | 383 (42.04%) |
| Congruence between assumed and preferred decision role | Yes: n (%)                                                                              | 685 (49.89%) | 172 (37.23%) | 513 (56.31%) |
|                                                        | No: n (%)                                                                               | 688 (50.11%) | 290 (62.77%) | 398 (43.69%) |
| Perception of assumed decision role                    | I made the decision alone: n (%)                                                        | 371 (27.02%) | 152 (32.90%) | 219 (24.04%) |
|                                                        | I made the decision alone but considered the opinion of my health care providers: n (%) | 436 (31.76%) | 150 (32.47%) | 286 (31.39%) |

|                                                        |                                                                             |              |              |              |
|--------------------------------------------------------|-----------------------------------------------------------------------------|--------------|--------------|--------------|
|                                                        | My health care providers and I decided together, equally: n (%)             | 372 (27.09%) | 75 (16.23%)  | 297 (32.60%) |
|                                                        | My health care providers made the decision but considered my opinion: n (%) | 126 (9.18%)  | 45 (9.74%)   | 81 (8.89%)   |
|                                                        | My health care providers made the decision alone: n (%)                     | 68 (4.95%)   | 40 (8.66%)   | 28 (3.08%)   |
| Considered elements during the decision-making process | Option's cost: n (%)                                                        | 369 (26.88%) | 125 (27.06%) | 244 (26.78%) |
|                                                        | Pressure from others: n (%)                                                 | 120 (8.74%)  | 53 (11.47%)  | 67 (7.35%)   |
|                                                        | Time to implement the option: n (%)                                         | 256 (18.65%) | 93 (20.13%)  | 163 (17.89%) |
|                                                        | Time before potential outcome: n (%)                                        | 324 (23.60%) | 118 (25.54%) | 206 (22.61%) |
|                                                        | Delay in accessing the option: n (%)                                        | 234 (17.04%) | 94 (20.35%)  | 140 (15.37%) |
|                                                        | Potential benefits: n (%)                                                   | 678 (49.38%) | 207 (44.81%) | 471 (51.70%) |
|                                                        | Potential harms: n (%)                                                      | 581 (42.32%) | 198 (42.86%) | 383 (42.04%) |
|                                                        | Option's consequences on your social, familial, or affective life: n (%)    | 359 (26.15%) | 127 (27.49%) | 232 (25.47%) |
|                                                        | Option's consequences on your diet and consumptions: n (%)                  | 232 (16.90%) | 78 (16.88%)  | 154 (16.90%) |
|                                                        | Option's consequences on a potential pregnancy: n (%)                       | 54 (3.93%)   | 20 (4.33%)   | 34 (3.73%)   |

|                             |                                                         |              |              |              |
|-----------------------------|---------------------------------------------------------|--------------|--------------|--------------|
|                             | Option's consequences on your leisure: n (%)            | 329 (23.96%) | 110 (23.81%) | 219 (24.04%) |
|                             | Option's consequences on your work or occupation: n (%) | 342 (24.91%) | 99 (21.43%)  | 243 (26.67%) |
|                             | Option's consequences on your mobility: n (%)           | 412 (30.00%) | 133 (28.79%) | 279 (30.63%) |
|                             | Environmental impacts of the option: n (%)              | 60 (4.37%)   | 20 (4.33%)   | 40 (4.39%)   |
|                             | Other: n (%)                                            | 12 (0.87%)   | 6 (1.30%)    | 6 (0.66%)    |
|                             | No element: n (%)                                       | 82 (5.97%)   | 35 (7.58%)   | 47 (5.16%)   |
|                             |                                                         |              |              |              |
| Decisional conflict (0-100) | Mean                                                    | 30.76        | 49.56        | 21.23        |
|                             | SD                                                      | 17.02        | 9.96         | 10.78        |
|                             | Min                                                     | 0.00         | 37.50        | 0.00         |
|                             | Max                                                     | 93.75        | 93.75        | 35.94        |

**Supplementary Table S2:** Results of non-ODSF model and the sensitivity analyses

1. Regression coefficients of the multilevel linear regression model based on the Ottawa Decision Support Framework.

| <b>Personal characteristics</b>                |       |               |
|------------------------------------------------|-------|---------------|
| Variable                                       | Beta  | 95% CI        |
| Age                                            | -0.03 | -0.08 to 0.02 |
| Cultural and ethnical backgrounds              |       |               |
| Only north american (except Aboriginal)        | REF   | REF           |
| Multiple origins (north american + other)      | -0.67 | -3.53 to 2.19 |
| Only other                                     | -0.39 | -1.84 to 1.06 |
| Education level                                |       |               |
| Above the bachelor's level                     | REF   | REF           |
| Bachelor's degree                              | -1.81 | -4.13 to 0.51 |
| University diploma below bachelor's level      | -1.42 | -4.34 to 1.49 |
| College, CEGEP or other non-university diploma | -1.72 | -4.07 to 0.62 |
| High school or equivalency                     | -2.23 | -4.75 to 0.30 |
| Less than high school or equivalency           | -2.76 | -7.98 to 2.47 |
| Geographical area                              |       |               |
| Urban                                          | REF   | REF           |
| Rural                                          | -0.78 | -2.94 to 1.39 |
| Household income (in CAD)                      |       |               |
| Less than 50,000                               | REF   | REF           |
| 50,000 to less than 60,000                     | 1.80  | -0.51 to 4.10 |
| 60,000 to less than 80,000                     | 0.79  | -1.52 to 3.10 |
| 80,000 to less than 100,000                    | 0.44  | -1.83 to 2.71 |
| 100,000 or more                                | 0.89  | -1.09 to 2.87 |
| Pain duration                                  | -0.00 | -0.01 to 0.01 |

|                                                                                  |       |                 |
|----------------------------------------------------------------------------------|-------|-----------------|
| Quality of life*                                                                 | -2.42 | -3.01 to -1.84  |
| Sex                                                                              |       |                 |
| Male                                                                             | REF   | REF             |
| Female*                                                                          | 1.48  | 0.09 to 2.87    |
| Intersex                                                                         | -0.50 | -13.43 to 12.43 |
| Spirituality                                                                     |       |                 |
| No                                                                               | REF   | REF             |
| Yes                                                                              | -0.58 | -2.01 to 0.85   |
| <b>Decision-making characteristics</b>                                           |       |                 |
| Variable                                                                         | Beta  | 95% CI          |
| Assumed role                                                                     |       |                 |
| I made the decision alone (Active role)                                          | REF   | REF             |
| I made the decision alone but considered the opinion of my health care providers | -0.69 | -2.49 to 1.12   |
| My health care providers and I decided together, equally (Collaborative role)*   | -3.13 | -5.06 to -1.19  |
| My health care providers made the decision but considered my opinion             | -1.60 | -4.28 to 1.08   |
| My health care providers made the decision alone (Passive role)                  | 4.01  | 0.62 to 7.40    |
| Congruence between the assumed and preferred role                                |       |                 |
| No                                                                               | REF   | REF             |
| Yes*                                                                             | -3.58 | -5.02 to -2.14  |
| Decision self-efficacy*                                                          | -3.05 | -3.41 to -2.68  |
| Health literacy (problem understanding what doctor says)                         |       |                 |
| Never                                                                            | REF   | REF             |
| Occasionally                                                                     | 0.93  | -0.91 to 2.76   |
| Sometimes*                                                                       | 4.18  | 2.32 to 6.05    |
| Often*                                                                           | 3.91  | 1.38 to 6.43    |

|                                             |       |                 |
|---------------------------------------------|-------|-----------------|
| Always*                                     | -7.79 | -12.84 to -2.73 |
| Involvement of important other(s)           |       |                 |
| No                                          | REF   | REF             |
| Yes                                         | 0.35  | -1.10 to 1.80   |
| Most difficult decision                     |       |                 |
| Take medication                             | REF   | REF             |
| Get surgery                                 | -0.13 | -2.34 to 2.07   |
| Change treatment                            | 1.42  | -1.51 to 4,35   |
| Stop my treatment                           | -0.50 | -4.15 to 3.14   |
| Change lifestyle habits and behaviors       | -1.44 | -3.82 to 0.93   |
| Consult a rehabilitation professional       | 0.73  | -2.89 to 4.36   |
| Consult a CAM professional                  | -1.02 | -3.59 to 1.55   |
| Consult a mental-health professional*       | -4.83 | -8.73 to -0.94  |
| Change the healthcare provider*             | 5.17  | 2.10 to 8.24    |
| Undergo more diagnostic tests               | -0.93 | -3.55 to 1.70   |
| Other                                       | 3.15  | -11.43 to 17.74 |
| Prior knowledge on the options              |       |                 |
| On all the options                          | REF   | REF             |
| On certain options*                         | 3.92  | 2.22 to 5.62    |
| No prior knowledge*                         | 4.64  | 2.38 to 6.89    |
| <b>Adjustment variable</b>                  |       |                 |
| Variable                                    | Beta  | 95% CI          |
| Accuracy of the recall of the consultation* | -0.08 | -0.11 to -0.06  |

- \* Statistically significant

**CAM:** Complementary and Alternative Medicine

**CAD:** Canadian Dollar

2. Regression coefficients of the multilevel linear regression model based on the Ottawa Decision Support Framework and expanded with the non-ODSF.

| <b>Personal characteristics</b>                |       |                |
|------------------------------------------------|-------|----------------|
| Variable                                       | Beta  | 95% CI         |
| Age                                            | -0.02 | -0.08 to 0.03  |
| Comorbidity                                    |       |                |
| No comorbidity                                 | 0.66  | -1.45 to 2.78  |
| Presence of diseases of the respiratory system | -1.00 | -2.97 to 0.98  |
| Presence of hypertension                       | -0.50 | -2.25 to 1.26  |
| Presence of sleep disorders                    | -0.14 | -1.74 to 1.47  |
| Presence of substance-related disorders        | -1.29 | -4.83 to 2.25  |
| Presence of alcohol-related disorders*         | -4.83 | -8.52 to -1.15 |
| Presence of mental-health disorders            | 1.24  | -0.58 to 3.05  |
| Presence of diabetes                           | 0.25  | -1.77 to 2.27  |
| Presence of other comorbidities                | 1.67  | -0.54 to 3.88  |
| Cultural and ethnical backgrounds              |       |                |
| Only North American (except Aboriginal)        | REF   | REF            |
| Multiple origins (North American + other)      | -0.95 | -3.75 to 1.84  |
| Only other                                     | -0.33 | -1.79 to 1.14  |
| Education level                                |       |                |
| Above the bachelor's level                     | REF   | REF            |
| Bachelor's degree                              | -1.71 | -3.94 to 0.52  |
| University diploma below bachelor's level      | -0.90 | -3.72 to 1.92  |
| College, CEGEP or other non-university diploma | -1.59 | -3.86 to 0.68  |
| High school or equivalency                     | -1.94 | -4.40 to 0.52  |
| Less than high school or equivalency           | -2.70 | -7.78 to 2.39  |
| First learned language                         |       |                |
| English or French                              | REF   | REF            |
| Other                                          | 1.48  | -0.92 to 3.89  |



|                                                         |       |                |
|---------------------------------------------------------|-------|----------------|
| Geographical area                                       |       |                |
| Urban                                                   | REF   | REF            |
| Rural                                                   | -0.56 | -2.68 to 1.57  |
| Household income (in CAD)                               |       |                |
| Less than 50,000                                        | REF   | REF            |
| 50,000 to less than 60,000                              | 1.14  | -1.12 to 3.40  |
| 60,000 to less than 80,000                              | 0.32  | -2.03 to 2.67  |
| 80,000 to less than 100,000                             | 0.79  | -1.48 to 3.06  |
| 100,000 or more                                         | 1.20  | -0.84 to 3.24  |
| Number of people currently living in the household      | -0.44 | -1.02 to 0.13  |
| Pain duration                                           | 0.00  | -0.01 to 0.01  |
| Pain location                                           |       |                |
| Presence of head pain                                   | -1.33 | -3.39 to 0.71  |
| Presence of face pain                                   | 2.69  | -1.27 to 6.65  |
| Presence of neck pain                                   | -0.50 | -2.01 to 1.00  |
| Presence of middle back pain                            | -0.67 | -2.27 to 0.92  |
| Presence of low back pain                               | 0.88  | -0.58 to 2.35  |
| Presence of upper limb pain                             | -0.43 | -2.01 to 1.15  |
| Presence of lower limb pain                             | 1.29  | -0.14 to 2.71  |
| Presence of chest pain                                  | 1.10  | -2.07 to 4.27  |
| Presence of abdominal pain                              | 0.42  | -1.99 to 2.83  |
| Presence of pelvic pain*                                | 2.41  | 0.25 to 4.58   |
| Quality of life*                                        | -1.18 | -1.83 to -0.54 |
| Satisfaction with current health state                  |       |                |
| Yes                                                     | REF   | REF            |
| No*                                                     | 3.14  | 1.56 to 4.73   |
| Self-perception of disability and/or emotional distress |       |                |
| Yes                                                     | REF   | REF            |

|                                                                                  |       |                |
|----------------------------------------------------------------------------------|-------|----------------|
| No                                                                               | 0.95  | -0.50 to 2.40  |
| Sex                                                                              |       |                |
| Male                                                                             | REF   | REF            |
| Female                                                                           | 0.50  | -0.92 to 1.92  |
| Intersex                                                                         | 3.14  | -9.50 to 15.79 |
| Spirituality                                                                     |       |                |
| No                                                                               | REF   | REF            |
| Yes                                                                              | -0.54 | -1.93 to 0.86  |
| <b>Decision-making characteristics</b>                                           |       |                |
| Variable                                                                         | Beta  | 95% CI         |
| Assumed role                                                                     |       |                |
| I made the decision alone (Active role)                                          | REF   | REF            |
| I made the decision alone but considered the opinion of my health care providers | -0.48 | -2.26 to 1.31  |
| My health care providers and I decided together, equally (Collaborative role)*   | -2.86 | -4.77 to -0.95 |
| My health care providers made the decision but considered my opinion             | -1.76 | -4.38 to 0.85  |
| My health care providers made the decision alone (Passive role)*                 | 3.58  | 0.26 to 6.89   |
| Congruence between the assumed and preferred role                                |       |                |
| No                                                                               | REF   | REF            |
| Yes*                                                                             | -3.50 | -4.90 to -2.10 |
| Congruence between the chosen and preferred option                               |       |                |
| Yes                                                                              | REF   | REF            |
| No*                                                                              | 7.25  | 5.18 to 9.32   |
| I don't know, I let my health care provider decide for me*                       | 3.22  | 1.38 to 5.06   |
| Considered element during the decision-making process                            |       |                |

|                                                               |       |                 |
|---------------------------------------------------------------|-------|-----------------|
| No element considered                                         | 0.96  | -2.11 to 4.02   |
| Options' consequences on mobility                             | -0.06 | -1.72 to 1.61   |
| Options' consequences on environment*                         | -4.61 | -7.99 to -1.23  |
| Options' consequences on work                                 | -1.14 | -2.83 to 0.55   |
| Options' consequences on leisure                              | 0.82  | -0.94 to 2.58   |
| Options' consequences on pregnancy                            | -2.66 | -6.22 to 0.90   |
| Options' consequences on diet and consumptions                | 0.89  | -1.00 to 2.78   |
| Options' consequences on social, familial, and affective life | 0.46  | -1.22 to 2.13   |
| Options' potential harms                                      | 0.30  | -1.25 to 1.85   |
| Options' potential benefits                                   | 0.40  | -1.08 to 1.87   |
| Delay in accessing the option                                 | -0.31 | -2.23 to 1.62   |
| Time before potential outcome                                 | 0.14  | -1.56 to 1.84   |
| Time to implement the option                                  | 1.25  | -0.63 to 3.14   |
| Pressure from others to choose a particular option            | 1.64  | -0.78 to 4.07   |
| Decision self-efficacy*                                       | -2.67 | -3.03 to -2.31  |
| Health literacy (problem understanding what doctor says)      |       |                 |
| Never                                                         | REF   | REF             |
| Occasionally                                                  | 0.67  | -1.10 to 2.45   |
| Sometimes*                                                    | 3.34  | 1.49 to 5.18    |
| Often*                                                        | 3.22  | 0.72 to 5.72    |
| Always*                                                       | -8.33 | -13.26 to -3.40 |
| Involvement of important other(s)                             |       |                 |
| No                                                            | REF   | REF             |
| Yes                                                           | 0.03  | -1.41 to 1.48   |
| Most difficult decision                                       |       |                 |
| Take medication                                               | REF   | REF             |
| Get surgery                                                   | -0.60 | -2.83 to 1.61   |

|                                                           |       |                |
|-----------------------------------------------------------|-------|----------------|
| Change treatment                                          | 1.22  | -1.64 to 4.08  |
| Stop my treatment                                         | -0.72 | -4.25 to 2.81  |
| Change lifestyle habits and behaviors                     | -1.00 | -3.40 to 1.41  |
| Consult a rehabilitation professional                     | 1.03  | -2.52 to 4.59  |
| Consult a CAM professional                                | -0.49 | -3.06 to 2.08  |
| Consult a mental-health professional*                     | -5.39 | -9.27 to -1.53 |
| Change the healthcare provider*                           | 3.19  | 0.12 to 6.26   |
| Undergo more diagnostic tests                             | -0.76 | -3.38 to 1.86  |
| Other                                                     | -5.17 | -19.34 to 8.99 |
| Prior knowledge on the options                            |       |                |
| On all the options                                        | REF   | REF            |
| On certain options*                                       | 3.89  | 2.22 to 5.56   |
| No prior knowledge*                                       | 4.19  | 1.93 to 6.46   |
| Self-perception of being stressed during the consultation |       |                |
| Yes                                                       | REF   | REF            |
| No*                                                       | -4.69 | -6.21 to -3.17 |
| <b>Adjustment variable</b>                                |       |                |
| Variable                                                  | Beta  | 95% CI         |
| Accuracy of the recall of the consultation*               | -0.08 | -0.11 to -0.05 |

- \* Statistically significant

**CAM:** Complementary and Alternative Medicine

**CAD:** Canadian Dollar

3. Comparison between the results of model 1 and the complete case sensitivity analysis.

| Personal characteristics                       |                        |                     |                    |                 |
|------------------------------------------------|------------------------|---------------------|--------------------|-----------------|
| Variable                                       | Odd ratio<br>(model 1) | 95% CI<br>(model 1) | Odd ratio<br>(CCA) | 95% CI<br>(CCA) |
| Age                                            | 0.98                   | 0.97 to 1           | 0.99               | 0.97 to 0.99    |
| Cultural and ethnical backgrounds              |                        |                     |                    |                 |
| Only North American (except Aboriginal)        | REF                    | REF                 | REF                | REF             |
| Multiple origins (North American + other)      | 0.93                   | 0.51 to 1.71        | 0.63               | 0.29 to 1.30    |
| Only other                                     | 0.88                   | 0.65 to 1.18        | 0.72               | 0.51 to 1.03    |
| Education level                                |                        |                     |                    |                 |
| Above the bachelor's level                     | REF                    | REF                 | REF                | REF             |
| Bachelor's degree                              | 0.64                   | 0.40 to 1.02        | 0.50               | 0.29 to 0.84    |
| University diploma below bachelor's level      | 0.78                   | 0.43 to 1.40        | 0.63               | 0.31 to 1.26    |
| College, CEGEP or other non-university diploma | 0.81                   | 0.50 to 1.31        | 0.57               | 0.34 to 0.97    |
| High school or equivalency                     | 0.69                   | 0.41 to 1.16        | 0.64               | 0.35 to 1.16    |
| Less than high school or equivalency           | 0.57                   | 0.20 to 1.69        | 0.56               | 0.14 to 2.10    |
| Geographical area                              |                        |                     |                    |                 |

|                                        |      |              |      |              |
|----------------------------------------|------|--------------|------|--------------|
| Urban                                  | REF  | REF          | REF  | REF          |
| Rural                                  | 1.26 | 0.80 to 1.98 | 1.38 | 0.80 to 2.37 |
| Household income (in CAD)              |      |              |      |              |
| Less than 50,000                       | REF  | REF          | REF  | REF          |
| 50,000 to less than 60,000             | 1.10 | 0.67 to 1.80 | 0.99 | 0.57 to 1.72 |
| 60,000 to less than 80,000             | 1.06 | 0.65 to 1.74 | 0.90 | 0.51 to 1.59 |
| 80,000 to less than 100,000            | 1.08 | 0.67 to 1.74 | 0.90 | 0.52 to 1.56 |
| 100,000 or more                        | 1.14 | 0.75 to 1.74 | 1.01 | 0.64 to 1.62 |
| Pain duration                          | 1.00 | 1 to 1       | 1.00 | 1 to 1       |
| Quality of life                        | 0.71 | 0.63 to 0.81 | 0.68 | 0.59 to 0.79 |
| Sex                                    |      |              |      |              |
| Male                                   | REF  | REF          | REF  | REF          |
| Female                                 | 1.12 | 0.84 to 1.50 | 1.02 | 0.73 to 1.44 |
| Intersex                               | 0.62 | 0.06 to 6.88 | 1.67 | 0.05 to 61.1 |
| Spirituality                           |      |              |      |              |
| No                                     | REF  | REF          | REF  | REF          |
| Yes                                    | 0.83 | 0.62 to 1.11 | 0.86 | 0.61 to 1.21 |
| <b>Decision-making characteristics</b> |      |              |      |              |

| Variable                                                                         | Odd ratio<br>(model 1) | 95% CI<br>(model 1) | Odd ratio<br>(CCA) | 95%CI<br>(CCA) |
|----------------------------------------------------------------------------------|------------------------|---------------------|--------------------|----------------|
| Assumed role                                                                     |                        |                     |                    |                |
| I made the decision alone (Active role)                                          | REF                    | REF                 | REF                | REF            |
| I made the decision alone but considered the opinion of my health care providers | 0.86                   | 0.60 to 1.24        | 0.85               | 0.55 to 1.30   |
| My health care providers and I decided together, equally (Collaborative role)    | 0.46                   | 0.30 to 0.69        | 0.50               | 0.30 to 0.83   |
| My health care providers made the decision but considered my opinion             | 0.69                   | 0.40 to 1.17        | 0.66               | 0.35 to 1.26   |
| My health care providers made the decision alone (Passive role)                  | 1.22                   | 0.64 to 2.34        | 1.04               | 0.49 to 2.20   |
| Congruence between the assumed and preferred role                                |                        |                     |                    |                |
| No                                                                               | REF                    | REF                 | REF                | REF            |
| Yes                                                                              | 0.57                   | 0.43 to 0.77        | 0.59               | 0.41 to 0.83   |
| Decision self-efficacy                                                           | 0.65                   | 0.59 to 0.70        | 0.62               | 0.56 to 0.68   |
| Health literacy (problem understanding what doctor says)                         |                        |                     |                    |                |
| Never                                                                            | REF                    | REF                 | REF                | REF            |

|                                       |      |              |      |              |
|---------------------------------------|------|--------------|------|--------------|
| Occasionally                          | 1.28 | 0.85 to 1.93 | 1.81 | 1.11 to 2.94 |
| Sometimes                             | 2.43 | 1.65 to 3.58 | 2.96 | 1.87 to 4.70 |
| Often                                 | 2.23 | 1.34 to 3.69 | 2.80 | 1.51 to 5.17 |
| Always                                | 0.66 | 0.20 to 2.14 | 0.55 | 0.13 to 2.04 |
| Involvement of important other(s)     |      |              |      |              |
| No                                    | REF  | REF          | REF  | REF          |
| Yes                                   | 0.97 | 0.72 to 1.31 | 0.99 | 0.70 to 1.42 |
| Most difficult decision               |      |              |      |              |
| Take medication                       | REF  | REF          | REF  | REF          |
| Get surgery                           | 1.12 | 0.70 to 1.81 | 1.16 | 0.68 to 1.98 |
| Change treatment                      | 1.30 | 0.73 to 2.32 | 1.22 | 0.57 to 2.58 |
| Stop my treatment                     | 0.84 | 0.41 to 1.72 | 0.71 | 0.27 to 1.74 |
| Change lifestyle habits and behaviors | 0.66 | 0.40 to 1.10 | 0.71 | 0.39 to 1.27 |
| Consult a rehabilitation professional | 1.13 | 0.55 to 2.29 | 1.21 | 0.51 to 2.84 |
| Consult a CAM professional            | 1.15 | 0.69 to 1.94 | 1.06 | 0.59 to 1.93 |
| Consult a mental-health professional  | 0.42 | 0.18 to 0.95 | 0.44 | 0.13 to 1.33 |
| Change the healthcare provider        | 1.79 | 0.99 to 3.25 | 2.25 | 1.13 to 4.52 |
| Undergo more diagnostic tests         | 0.77 | 0.45 to 1.33 | 0.69 | 0.36 to 1.30 |



|                                            |                        |                     |                    |                |
|--------------------------------------------|------------------------|---------------------|--------------------|----------------|
| Other                                      | 12.23                  | 0.17 to 876         | 15.1               | 0.2 to 1086    |
| Prior knowledge on the options             |                        |                     |                    |                |
| On all the options                         | REF                    | REF                 | REF                | REF            |
| On certain options                         | 1.47                   | 1.00 to 2.14        | 1.27               | 0.83 to 1.94   |
| No prior knowledge                         | 2.03                   | 1.27 to 3.25        | 1.29               | 0.73 to 2.29   |
| <b>Adjustment variable</b>                 |                        |                     |                    |                |
| Variable                                   | Odd ratio<br>(model 1) | 95% CI<br>(model 1) | Odd ratio<br>(CCA) | 95%CI<br>(CCA) |
| Accuracy of the recall of the consultation | 0.99                   | 0.98 to 0.99        | 0.99               | 0.98 to 0.99   |

**CCA:** Complete case analysis

**CAM:** Complementary and Alternative Medicine

**CAD:** Canadian Dollar

**Supplementary Table S3:** Comparison of total and attrition sample profiles

| Characteristics                          | Descriptives analyses    | All sample (n=1,649) | PwCP with DCS score (n=1,373) |
|------------------------------------------|--------------------------|----------------------|-------------------------------|
| <b>Socio-demographic characteristics</b> |                          |                      |                               |
| Age (years)                              | Mean                     | 51.84                | 52                            |
|                                          | SD                       | 16.33                | 16.36                         |
|                                          | Min                      | 18.00                | 18.00                         |
|                                          | Max                      | 90.00                | 90.00                         |
| Sex                                      | Male: n (%)              | 854 (51.79%)         | 686 (49.97%)                  |
|                                          | Female: n (%)            | 789 (47.85%)         | 682 (49.67%)                  |
|                                          | Intersex: n (%)          | 4 (0.24%)            | 4 (0.29%)                     |
|                                          | Prefer not to say: n (%) | 2 (0.12%)            | 1 (0.07%)                     |
| Gender                                   | Man: n (%)               | 847 (51.36%)         | 680 (49.53%)                  |
|                                          | Woman: n (%)             | 777 (47.12%)         | 671 (48.87%)                  |
|                                          | Non-binary: n (%)        | 10 (0.61%)           | 8 (0.58%)                     |
|                                          | Transgender woman: n (%) | 1 (0.06%)            | 1 (0.07%)                     |
|                                          | Transgender man: n (%)   | 2 (0.12%)            | 2 (0.15%)                     |
|                                          | Two-spirit: n (%)        | 3 (0.18%)            | 3 (0.22%)                     |

|                        |                               |      |          |      |          |
|------------------------|-------------------------------|------|----------|------|----------|
|                        | Gender fluid: n (%)           | 4    | (0.24%)  | 3    | (0.22%)  |
|                        | Other: n (%)                  | 0    | (0.00%)  | 0    | (0.00%)  |
|                        | Prefer not to say: n (%)      | 0    | (0.00%)  | 0    | (0.00%)  |
|                        | Missing data: n (%)           | 5    | (0.30%)  | 5    | (0.36%)  |
| Provinces              | British Columbia: n (%)       | 268  | (16.25%) | 220  | (16.02%) |
|                        | Alberta: n (%)                | 217  | (13.16%) | 188  | (13.69%) |
|                        | Prairies: n (%)               | 121  | (7.34%)  | 103  | (7.50%)  |
|                        | Ontario: n (%)                | 579  | (35.11%) | 487  | (35.47%) |
|                        | Quebec: n (%)                 | 332  | (20.13%) | 273  | (19.89%) |
|                        | Atlantic Canada: n (%)        | 132  | (8.00%)  | 102  | (7.43%)  |
| Geographical area      | Rural: n (%)                  | 202  | (12.25%) | 162  | (11.80%) |
|                        | Urban: n (%)                  | 1447 | (87.75%) | 1211 | (88.20%) |
| First learned language | French: n (%)                 | 378  | (22.92%) | 315  | (22.94%) |
|                        | English: n (%)                | 1122 | (68.04%) | 931  | (67.80%) |
|                        | An aboriginal language: n (%) | 2    | (0.12%)  | 2    | (0.15%)  |
|                        | Spanish: n (%)                | 10   | (0.61%)  | 9    | (0.66%)  |
|                        | Mandarin: n (%)               | 15   | (0.91%)  | 15   | (1.09%)  |
|                        | Arabic: n (%)                 | 9    | (0.55%)  | 9    | (0.66%)  |

|                                   |                                                                      |              |               |
|-----------------------------------|----------------------------------------------------------------------|--------------|---------------|
|                                   | Other: n (%)                                                         | 113 (6.85%)  | 92 (6.70%)    |
| Education level                   | Less than a high school diploma: n (%)                               | 46 (2.79%)   | 30 (2.19%)    |
|                                   | High School diploma: n (%)                                           | 338 (20.50%) | 264 (19.23%)  |
|                                   | College, CEGEP or other non-university certificate or diploma: n (%) | 479 (29.05%) | 405 (29.50%)  |
|                                   | University certificate: n (%)                                        | 163 (9.88%)  | 135 (9.83%)   |
|                                   | Bachelor's degree: n (%)                                             | 398 (24.14%) | 351 (25.56%)  |
|                                   | Above the bachelor's level: n (%)                                    | 213 (12.92%) | 181 (13.18%)  |
|                                   | Prefer not to say: n (%)                                             | 12 (0.73%)   | 7 (0.51%)     |
| Literacy                          | Always: n (%)                                                        | 32 (1.94%)   | 29 (2.12%)    |
|                                   | Often: n (%)                                                         | 172 (10.43%) | 156 (11.36 %) |
|                                   | Sometimes: n (%)                                                     | 482 (29.23%) | 419 (30.52%)  |
|                                   | Occasionally: n (%)                                                  | 456 (27.65%) | 372 (27.09%)  |
|                                   | Never: n (%)                                                         | 507 (30.75%) | 397 (28.91%)  |
| Cultural and ethnical backgrounds | Aboriginal: n (%)                                                    | 84 (5.09%)   | 74 (5.39%)    |
|                                   | North American: n (%)                                                | 770 (46.69%) | 626 (45.59%)  |
|                                   | European: n (%)                                                      | 662 (40.15%) | 552 (40.20%)  |
|                                   | Caribbean: n (%)                                                     | 24 (1.46%)   | 20 (1.46%)    |
|                                   | Latin, south American: n (%)                                         | 16 (0.97%)   | 15 (1.09%)    |

|                |                                                             |     |          |     |          |
|----------------|-------------------------------------------------------------|-----|----------|-----|----------|
|                | African: n (%)                                              | 22  | (1.33%)  | 20  | (1.46%)  |
|                | Asian: n (%)                                                | 169 | (10.25%) | 144 | (10.49%) |
|                | Oceanian: n (%)                                             | 3   | (0.18%)  | 3   | (0.22%)  |
|                | Other: n (%)                                                | 4   | (0.24%)  | 4   | (0.29%)  |
|                | Prefer not to say: n (%)                                    | 49  | (2.97%)  | 38  | (2.77%)  |
|                | Missing data: n (%)                                         | 4   | (0.24%)  | 0   | (0.00%)  |
| Spirituality   | Buddhist: n (%)                                             | 18  | (1.09%)  | 17  | (1.25%)  |
|                | Christian: n (%)                                            | 694 | (42.09%) | 578 | (42.09%) |
|                | Hindu: n (%)                                                | 14  | (0.85%)  | 12  | (0.87%)  |
|                | Jewish: n (%)                                               | 22  | (1.33%)  | 19  | (1.38%)  |
|                | Muslim: n (%)                                               | 32  | (1.94%)  | 31  | (2.26%)  |
|                | Sikh: n (%)                                                 | 15  | (0.91%)  | 13  | (0.95%)  |
|                | Traditional (North American Indigenous) spirituality: n (%) | 21  | (1.27%)  | 21  | (1.53%)  |
|                | Other: n (%)                                                | 33  | (2.00%)  | 26  | (1.89%)  |
|                | No religious or spiritual affiliations: n (%)               | 735 | (44.57%) | 601 | (43.77%) |
|                | Prefer not to say: n (%)                                    | 64  | (3.88%)  | 55  | (4.01%)  |
|                | Missing data: n (%)                                         | 1   | (0.06%)  | 0   | (0.00%)  |
| Marital status | Never legally married: n (%)                                | 402 | (24.38%) | 329 | (23.96%) |

|                                   |                                             |              |              |
|-----------------------------------|---------------------------------------------|--------------|--------------|
|                                   | Legally married: n (%)                      | 759 (46.03%) | 647 (47.12%) |
|                                   | Separated, but still legally married: n (%) | 49 (2.97%)   | 40 (2.92%)   |
|                                   | Divorced: n, (%)                            | 144 (8.73%)  | 116 (8.45%)  |
|                                   | Widowed: n (%)                              | 60 (3.64%)   | 50 (3.64%)   |
|                                   | Living common law: n (%)                    | 210 (12.73%) | 170 (12.38%) |
|                                   | Prefer not to say: n (%)                    | 25 (1.52%)   | 21 (1.53%)   |
|                                   |                                             |              |              |
| Number of people in the household | Mean                                        | 2.45         | 2.50         |
|                                   | SD                                          | 1.28         | 1.28         |
|                                   | Min                                         | 1.00         | 1.00         |
|                                   | Max                                         | 10.00        | 10.00        |
|                                   |                                             |              |              |
| Household income (CAD)            | Less than \$50,000: n (%)                   | 481 (29.17%) | 388 (28.26%) |
|                                   | \$50,000 to less than \$60,000: n (%)       | 199 (12.07%) | 172 (12.54%) |
|                                   | \$60,000 to less than \$80,000: n (%)       | 215 (13.04%) | 185 (13.47%) |
|                                   | \$80,000 to less than \$100,000: n (%)      | 233 (14.13%) | 192 (13.98%) |
|                                   | \$100,000 or more: n (%)                    | 406 (24.62%) | 350 (25.49%) |
|                                   | Prefer not to say: n (%)                    | 115 (6.97%)  | 86 (6.26%)   |
|                                   |                                             |              |              |
| Work status                       | Currently working full-time: n (%)          | 649 (39.36%) | 551 (40.13%) |
|                                   | Currently working part-time: n (%)          | 153 (9.28%)  | 123 (8.96%)  |

|                             |                                                      |     |          |     |          |
|-----------------------------|------------------------------------------------------|-----|----------|-----|----------|
|                             | Homemaker, no outside employment: n (%)              | 59  | (3.58%)  | 54  | (3.93%)  |
|                             | Student: n (%)                                       | 65  | (3.94%)  | 51  | (3.71%)  |
|                             | Unemployed: n (%)                                    | 64  | (3.88%)  | 52  | (3.79%)  |
|                             | Retired: n (%)                                       | 505 | (30.62%) | 415 | (30.23%) |
|                             | Long term or permanent disability: n (%)             | 106 | (6.43%)  | 85  | (6.19%)  |
|                             | Total sick leave with financial assistance: n (%)    | 16  | (0.97%)  | 15  | (1.09%)  |
|                             | Total sick leave with no financial assistance: n (%) | 11  | (0.67%)  | 11  | (0.80%)  |
|                             | Partial sick leave: n (%)                            | 3   | (0.18%)  | 3   | (0.22%)  |
|                             | Prefer not to say: n (%)                             | 18  | (1.09%)  | 13  | (0.95%)  |
| <b>Pain characteristics</b> |                                                      |     |          |     |          |
| Pain location               | Head: n (%)                                          | 246 | (14.92%) | 213 | (15.51%) |
|                             | Face: n (%)                                          | 59  | (3.58%)  | 46  | (3.35%)  |
|                             | Neck: n (%)                                          | 555 | (33.66%) | 478 | (34.81%) |
|                             | Middle back: n (%)                                   | 465 | (28.20%) | 409 | (29.79%) |
|                             | Low back: n, (%)                                     | 944 | (57.25%) | 794 | (57.83%) |
|                             | Upper limb: n (%)                                    | 414 | (25.11%) | 337 | (24.54%) |
|                             | Lower limb: n (%)                                    | 666 | (40.39%) | 544 | (39.62%) |
|                             | Abdominal: n (%)                                     | 149 | (9.04%)  | 135 | (9.83%)  |

|                        |                                 |              |              |
|------------------------|---------------------------------|--------------|--------------|
|                        | Pelvic: n (%)                   | 191 (11.58%) | 163 (11.87%) |
|                        | Chest: n (%)                    | 86 (5.22%)   | 73 (5.32%)   |
|                        | Other: n (%)                    | 12 (0.73%)   | 9 (0.66%)    |
|                        | Missing data: n (%)             | 2 (0.12%)    | 0 (0.00%)    |
|                        | Mean                            | 2.30         | 2.33         |
|                        | SD                              | 1.52         | 1.53         |
|                        | Min                             | 1.00         | 1.00         |
|                        | Max                             | 10.00        | 10.00        |
| Pain duration (months) | Mean                            | 102.12       | 102.2        |
|                        | SD                              | 115.36       | 113.95       |
|                        | Min                             | 3.00         | 3.00         |
|                        | Max                             | 708.00       | 708.00       |
|                        | Don't remember precisely: n (%) | 202 (12.25%) | 135 (9.83%)  |
| Comorbidity            | Diabetes: n (%)                 | 243 (14.74%) | 204 (14.86%) |
|                        | Mental health disorders: n (%)  | 501 (30.38)  | 438 (31.90%) |
|                        | Alcohol use disorders: n (%)    | 53 (3.21%)   | 49 (3.57%)   |
|                        | Substance use disorders: n (%)  | 58 (3.52%)   | 54 (3.93%)   |
|                        | Sleep disorders: n (%)          | 489 (29.65%) | 417 (30.37%) |



|                                                |                              |               |              |
|------------------------------------------------|------------------------------|---------------|--------------|
|                                                | Hypertension: n (%)          | 436 (26.44%)  | 373 (27.17%) |
|                                                | Respiratory disorders: n (%) | 227 (13.77%)  | 193 (14.06%) |
|                                                | Other: n (%)                 | 195 (11.83%)  | 178 (12.96%) |
|                                                | No comorbidity: n (%)        | 465 (28.20%)  | 360 (26.22%) |
|                                                | Mean                         | 1.34          | 1.39         |
|                                                | SD                           | 1.20          | 1.20         |
|                                                | Min                          | 0.00          | 0.00         |
|                                                | Max                          | 6.00          | 6.00         |
| Perceived disability and/or emotional distress | Yes: n (%)                   | 794 (48.15%)  | 689 (50.18%) |
|                                                | No: n (%)                    | 855 (51.85%)  | 684 (49.82%) |
| Quality of life (seven-point Likert scale)     | Mean                         | 4.59          | 4.57         |
|                                                | SD                           | 1.25          | 1.27         |
|                                                | Min                          | 1.00          | 1.00         |
|                                                | Max                          | 7.00          | 7.00         |
| Health state satisfaction                      | Yes: n (%)                   | 1080 (65.49%) | 874 (63.66%) |
|                                                | No: n (%)                    | 569 (34.51%)  | 499 (36.34%) |

**Supplementary Methods S4:** Detailed information on the methods

**1. R packages**

| <b>Purpose</b>                           | <b>Package</b>                                 |
|------------------------------------------|------------------------------------------------|
| Data preparation                         | dplyr<br>readxl                                |
| Data visualizations                      | ggplot2<br>sjPlot                              |
| Multiple Imputation by Chained Equations | mice                                           |
| Multilevel regression                    | lme4<br>broom.mixed<br>performance<br>lmerTest |
| Forest plot                              | checkmate<br>abind<br>foresplot<br>grid        |
| Missing data                             | performance<br>VIM<br>howManyImputations       |
| Sample size                              | pmsampsize                                     |

## 2. Missing data and multiple imputation

Missing data could be observed due to data cleaning, “prefer not to say” response option, and “I don’t remember” response option. We assumed that the missing data were Missing At Random (MAR).

### Distribution of the missing data:

We observed missing data on eleven independent variables ranged between 9.8% (pain duration) and 0.07% (sex) of missing data.

We observed missing data on 357 (26%) observations ranged between 6.93% and 0.99% of missing data.

### Imputation model:

We checked the consistency of the imputed data with data visualization (function densityplot of the MICE package) (see example below).

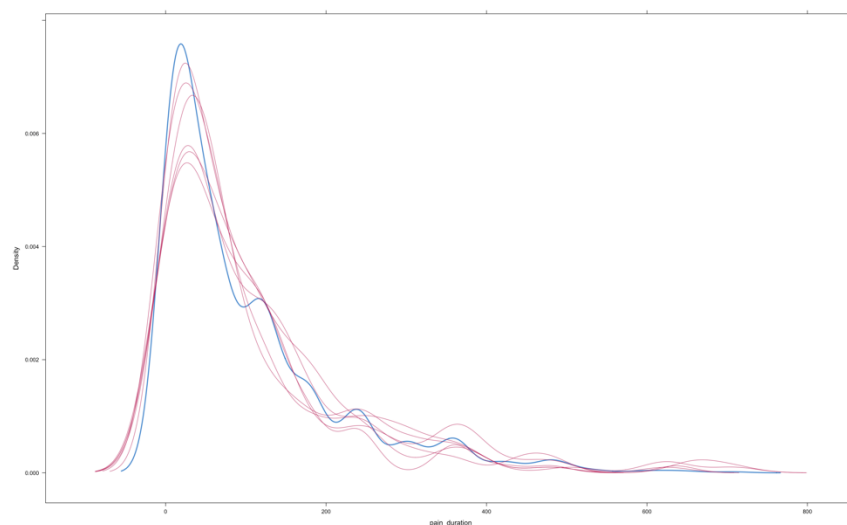

### **3. Recoding of variables:**

We performed recoding of variables such as reduction of categories or modification of the reference category. More precisely, we created two variables:

- Congruence between the assumed and preferred role combining two variables (assumed role and preferred role)
- Geographical area using the three first characters of the postal code (1)

We modified five variables:

- Involvement of important other(s): from 6 variables (e.g., spouse, children, friends) to 2 categories (i.e., presence or absence of important other(s)).
- Ethnical and cultural backgrounds: from 9 variables (e.g., North American, African) to 3 categories (i.e., North American (except Aboriginals), multiple origins: North American + Other, Other)
- Spirituality: from 10 categories (e.g., Buddhist, Muslim) to 2 categories (i.e., presence or absence of spirituality)
- First learned language: from 7 categories (e.g., English, French, Aboriginal language) to 2 categories (i.e., The two official Canadian languages, Other).

We modified the reference category of three variables due to a greater frequency:

- Spirituality
- Health literacy
- Education level.

### **References:**

1. Statistics Canada. How Postal Codes Map to Geographic Areas 2007 [Available from: <https://www150.statcan.gc.ca/n1/pub/92f0138m/2007001/4144811-eng.htm>].
